# Supplementary material
Source: publisher figshare collection journal article supplement (https://tandf.figshare.com/ndownloader/files/12939182)
Supplement: Supplementary file 1 [file 12939182]

| Number (n) | 480 |
| --- | --- |
| Male gender (%) | 70.4 |
| Age (years) | 44.9 ± 9.6 |
| Systolic BP (mmHg) | 120.8 ± 11.8 |
| Diastolic BP (mmHg) | 76.0 ± 8.6 |
| Heart Rate (bpm) | 66.9 ± 10.9 |
| Waist Circumference (cm) | 87.0 ± 11.9 |
| BMI (kg/m²) | 24.7 ± 3.3 |
| Glucose (mg/dl) | 89.9 ± 11.1 |
| Tryglicerides (mg/dl) | 93.0 ± 47.5 |
| Total cholesterol (mg/dl) | 195.6 ± 32.9 |
| HDL-cholesterol (mg/dl) | 57.1 ± 14.2 |
| LDL-cholesterol (mg/dl) | 122.4 ± 30.6 |
| Creatinine (mg/dl) | 0.88 ± 0.18 |
| Glomerular Filtration Rate (ml/min) | 96.0 ± 17.4 |
| PAI-1 (mg/L) | 0.023 ± 0.015 |
| P-selectin (mg/L) | 0.079 ± 0.036 |
| TIMP-1 (mg/L) | 0.091 ± 0.024 |
| Cystatin C (mg/L) | 0.63 ± 0.14 |
| Pulse Wave Velocity (m/s) | 7.6 ± 1.2 |
| Pulse Wave Velocity > 10 m/s (%) | 3.1 |
| Intima-Media Thickness (mm) | 0.62 ± 0.13 |
| Carotid Target Organ Damage (%) | 8.8 |
| Left Ventricular Mass Index (g/m²) | 96.8 ± 22.6 |
| Left Ventricular Hypertrophy (%) | 23.8 |
| Target Organ Damages (%) |  |
| -1 | 31.5 |
| - ≥2 | 2.1 |

Table S1: demographic, clinical, biochemical and Target Organ Damage characteristics of the whole population.

BP = Blood Pressure; PAI = Plasminogen Activator Inhibitor; TIMP = Tissue Inhibitor Metallo Proteinases.

Table S2: correlation analysis in the whole population.

|  | **Cystatin C** | **P-Selectin** | **PAI-1** | **TIMP - 1** |
| --- | --- | --- | --- | --- |
| Sex (Male = 1) | r= 0.19. p<0.01 | - | - | - |
| Age | r= 0.17. p<0.01 | - | - | - |
| Creatinine | r= 0.22. p<0.01 | - | - | r= 0.1. p=0.03 |
| Glomerular Filtration Rate | r= -0.19. p<0.01 | - | - | - |
| Pulse Wave Velocity | - | - | - | - |
| Left Ventricular Mass Index | r= 0.1. p= 0.02 | - | - | - |
| Intima-Media Thickness | r= 0.14. p<0.01 | - | - | r=0.11. p=0.02 |

PAI = Plasminogen Activator Inhibitor; TIMP = Tissue Inhibitor Metallo Proteinases.
